# Supplementary material for: Research on Location-Routing Problem for Logistics UAVs Based on Bi-layer Programming
Source: Research Square preprint supplement (doi:10.21203/rs.3.rs-8221874/v1), 2025-12-11
Supplement: Supplementary file 1 [file 8283ad1710f21f98eb8ea375.xlsx]

## Sheet: 需求点物流信息
需求点编号	经度	纬度	需求量	时间窗起点	时间窗终点
1	31.1164	121.735	1	1300	13300
2	31.1592	121.553	3.5	1300	13300
3	31.1451	121.815	3	900	12900
4	31.258	121.535	2	1100	13100
5	31.095	121.711	2.4	300	12300
6	31.0657	121.516	3	1200	13200
7	31.148	121.572	3.3	1000	13000
8	31.1185	121.484	4	1900	13900
9	31.0899	121.729	1.5	100	12100
10	31.1433	121.703	4	2700	14700
11	31.0707	121.483	2	2900	14900
12	31.2017	121.747	4	1500	13500
13	31.0552	121.604	1	1400	13400
14	31.198	121.588	0.7	1000	13000
15	31.2353	121.71	1	1400	13400
16	31.2431	121.712	4	2400	14400
17	31.1545	121.528	2	800	12800
18	31.2544	121.614	1.8	2000	14000
19	31.0785	121.671	2	200	12200
20	31.1211	121.62	1	200	12200
21	31.1639	121.803	2.3	1000	13000
22	31.1693	121.565	1	16	13600
23	31.0975	121.587	2	0	12000
24	31.1107	121.75	3	9	1290
25	31.2027	121.672	1	12	1320
26	31.2546	121.771	2.8	26	1460
27	31.0909	121.749	5	1	12100
28	31.1325	121.559	3	28	1480
29	31.1483	121.711	5	1	12185
30	31.0967	121.476	2.3	24	14452
31	31.0722	121.55	2	15	1353
32	31.1542	121.549	1	16	13622
33	31.2243	121.499	3	12	132
34	31.0993	121.616	3	28	14822
35	31.1891	121.694	1.4	22	14251
36	31.1827	121.725	3	15	13524
37	31.0841	121.485	2	21	14118
38	31.2187	121.684	2.3	15	13556
39	31.1467	121.567	3	10	13026
40	31.257	121.687	0.38	27	14725
41	31.2026	121.687	1	22	14252
42	31.1011	121.621	2	6	12652
43	31.147	121.491	1	25	14533
44	31.0586	121.789	2.7	28	14802
45	31.1751	121.72	2	4	12400
46	31.081	121.54	3.1	105	13057
47	31.1002	121.733	3	260	1465
48	31.1424	121.773	0.35	280	14825
49	31.1267	121.791	3	300	12320
50	31.1352	121.559	2	70	12700
51	31.2139	121.602	2.6	100	12100
52	31.1037	121.695	4	2700	14700
53	31.1469	121.643	2	2900	14900
54	31.1972	121.536	4	1500	13500
55	31.2532	121.552	1	1400	13400
56	31.14	121.649	0.7	1000	13000
57	31.1431	121.738	1	1400	13400
58	31.2258	121.668	4	2400	14400
59	31.0552	121.673	2	800	12800
60	31.1736	121.577	1.8	2000	14000
61	31.157	121.629	2	200	12200
62	31.0603	121.805	1	200	12200
63	31.064	121.586	2.3	1000	13000
64	31.1627	121.768	1	16	13600
65	31.1759	121.685	2	0	12000
66	31.2205	121.677	3	9	1290
67	31.1969	121.622	1	12	1320
68	31.0819	121.747	5	26	1460
69	31.1948	121.691	5	1	12100
70	31.207	121.573	3	28	1480
71	31.2104	121.792	2.1	1	12185
72	31.2553	121.662	3	260	1465
73	31.1892	121.724	0.57	280	14825
74	31.1579	121.674	3	300	12320
75	31.1376	121.788	2	70	12700
76	31.2022	121.723	5	100	12100
77	31.1805	121.578	4	2700	14700
78	31.2381	121.64	2	2900	14900
79	31.0778	121.637	4	1500	13500
80	31.1598	121.667	1	1400	13400
81	31.1042	121.731	0.7	1000	13000
82	31.1494	121.759	1	1400	13400
83	31.1785	121.612	1.2	2400	14400
84	31.1857	121.553	2	800	12800
85	31.0679	121.656	1.8	2000	14000
86	31.1303	121.709	2	200	12200
87	31.1867	121.714	1	200	12200
88	31.0714	121.697	2.3	1000	13000
89	31.2307	121.498	1	16	13600
90	31.1345	121.748	2	0	12000
91	31.1665	121.791	3	9	1290
92	31.168	121.601	1	12	1320
93	31.1559	121.606	0.79	26	1460
94	31.1876	121.617	0.67	1	12100
95	31.1815	121.603	3	28	1480
96	31.1284	121.547	3.5	1	12185
97	31.1608	121.708	1	12	1320
98	31.0819	121.654	5	26	1460
99	31.0909	121.787	0.25	1	12100
100	31.1252	121.767	3	28	1480
101	31.2256	121.775	1	1300	13300
102	31.1151	121.523	0.8	1300	13300
103	31.1696	121.661	3	900	12900
104	31.0793	121.628	2	1100	13100
105	31.246	121.534	0.6	300	12300
106	31.1598	121.753	3	1200	13200
107	31.0817	121.56	3	1000	13000
108	31.1865	121.491	0.4	1900	13900
109	31.1675	121.674	1	100	12100
110	31.181	121.667	2.3	2700	14700
111	31.2246	121.532	2	2900	14900
112	31.1425	121.744	4	1500	13500
113	31.2574	121.703	1	1400	13400
114	31.2349	121.564	0.7	1000	13000
115	31.1118	121.614	1	1400	13400
116	31.2504	121.698	4	2400	14400
117	31.0852	121.571	2	800	12800
118	31.0883	121.477	1.8	2000	14000
119	31.0685	121.651	2	200	12200
120	31.1874	121.668	1	200	12200
121	31.2401	121.792	1	1300	13300
122	31.2305	121.482	0.8	1300	13300
123	31.1908	121.6	3	900	12900
124	31.2193	121.624	2	1100	13100
125	31.1678	121.726	0.6	300	12300
126	31.113	121.571	3	1200	13200
127	31.087	121.735	3	1000	13000
128	31.0799	121.603	0.4	1900	13900
129	31.1536	121.774	1	100	12100
130	31.1764	121.619	2.3	2700	14700
131	31.2025	121.613	2	2900	14900
132	31.0553	121.808	4	1500	13500
133	31.1525	121.745	1	1400	13400
134	31.2571	121.736	0.7	1000	13000
135	31.2266	121.696	1	1400	13400
136	31.1574	121.636	4	2400	14400
137	31.1608	121.688	2	800	12800
138	31.0743	121.631	1.8	2000	14000
139	31.145	121.512	2	200	12200
140	31.1274	121.775	1	200	12200
141	31.0671	121.501	1	1300	13300
142	31.1759	121.491	0.8	1300	13300
143	31.2154	121.641	3	900	12900
144	31.086	121.783	2	1100	13100
145	31.0905	121.483	0.6	300	12300
146	31.0621	121.532	3	1200	13200
147	31.1359	121.608	3	1000	13000
148	31.0787	121.815	0.4	1900	13900
149	31.2601	121.728	1	100	12100
150	31.2391	121.774	2.3	2700	14700
151	31.1745	121.715	2	2900	14900
152	31.2052	121.777	4	1500	13500
153	31.0757	121.547	1	1400	13400
154	31.1956	121.761	0.7	1000	13000
155	31.2462	121.65	1	1400	13400
156	31.1201	121.658	4	2400	14400
157	31.2303	121.697	2	800	12800
158	31.0639	121.643	1.8	2000	14000
159	31.0654	121.62	2	200	12200
160	31.2562	121.748	1	200	12200
161	31.1221	121.72	1	1300	13300
162	31.2147	121.552	0.8	1300	13300
163	31.1767	121.633	3	900	12900
164	31.0902	121.728	2	1100	13100
165	31.073	121.787	0.6	300	12300
166	31.2376	121.695	3	1200	13200
167	31.1519	121.561	3	1000	13000
168	31.0654	121.7	0.4	1900	13900
169	31.2472	121.633	1	100	12100
170	31.0777	121.73	2.3	2700	14700
171	31.1341	121.535	1	1300	13300
172	31.1333	121.681	0.8	1300	13300
173	31.0958	121.69	3	900	12900
174	31.1202	121.504	2	1100	13100
175	31.2192	121.67	0.6	300	12300
176	31.1455	121.568	3	1200	13200
177	31.2192	121.558	3	1000	13000
178	31.0701	121.788	0.4	1900	13900
179	31.1657	121.731	1	100	12100
180	31.1772	121.712	2.3	2700	14700
181	31.2433	121.649	2	2900	14900
182	31.242	121.64	4	1500	13500
183	31.1476	121.768	1	1400	13400
184	31.0705	121.722	0.7	1000	13000
185	31.1989	121.581	1	1400	13400
186	31.2377	121.629	4	2400	14400
187	31.1349	121.509	2	800	12800
188	31.0545	121.557	1.8	2000	14000
189	31.2177	121.584	2	200	12200
190	31.1344	121.493	1	200	12200
191	31.0815	121.512	1	1300	13300
192	31.1089	121.478	0.8	1300	13300
193	31.1651	121.785	3	900	12900
194	31.1165	121.662	2	1100	13100
195	31.1857	121.663	0.6	300	12300
196	31.2344	121.707	3	1200	13200
197	31.0895	121.48	3	1000	13000
198	31.2546	121.579	0.4	1900	13900
199	31.1973	121.79	1	100	12100
200	31.2403	121.662	2.3	2700	14700
201	31.2348	121.475	1	1300	13300
202	31.091	121.765	3.5	1300	13300
203	31.1741	121.522	3	900	12900
204	31.1302	121.636	2	1100	13100
205	31.0624	121.706	2.4	300	12300
206	31.1537	121.528	3	1200	13200
207	31.16	121.552	3.3	1000	13000
208	31.1964	121.504	4	1900	13900
209	31.1864	121.54	1.5	100	12100
210	31.2039	121.785	4	2700	14700
211	31.1996	121.477	2	2900	14900
212	31.08	121.744	4	1500	13500
113	31.0719	121.513	1	1400	13400
114	31.1257	121.662	0.7	1000	13000
115	31.1158	121.611	1	1400	13400
116	31.2189	121.537	4	2400	14400
117	31.1552	121.792	2	800	12800
118	31.2279	121.76	1.8	2000	14000
119	31.2398	121.698	2	200	12200
220	31.1155	121.68	1	200	12200
221	31.2539	121.671	2.3	1000	13000
222	31.2171	121.551	1	16	13600
223	31.2608	121.567	2	0	12000
224	31.1722	121.646	3	9	1290
225	31.0856	121.591	1	12	1320
226	31.1781	121.614	2.8	26	1460
227	31.2414	121.526	5	1	12100
228	31.0893	121.581	3	28	1480
229	31.0874	121.676	5	1	12185
230	31.2549	121.709	2.3	24	14452
231	31.2206	121.586	2	15	1353
232	31.1014	121.801	1	16	13622
233	31.131	121.797	3	12	132
234	31.185	121.527	3	28	14822
235	31.1714	121.569	1.4	22	14251
236	31.0897	121.693	3	15	13524
237	31.1532	121.732	2	21	14118
238	31.0886	121.555	2.3	15	13556
239	31.2046	121.785	3	10	13026
240	31.2089	121.747	0.38	27	14725
241	31.0703	121.654	1	22	14252
242	31.2281	121.781	2.3	2700	14700
243	31.1709	121.744	2	2900	14900
244	31.1399	121.634	4	1500	13500
245	31.0926	121.663	1	1400	13400
246	31.2537	121.747	0.7	1000	13000
247	31.2556	121.695	1	1400	13400
248	31.1111	121.655	4	2400	14400
249	31.1518	121.812	2	800	12800
250	31.1694	121.675	1.8	2000	14000
251	31.1231	121.639	2	200	12200
252	31.1335	121.73	1	200	12200
253	31.1679	121.626	1	1300	13300
254	31.1885	121.718	0.8	1300	13300
255	31.0966	121.58	3	900	12900
256	31.0968	121.762	2	1100	13100
257	31.2443	121.743	0.6	300	12300
258	31.1147	121.665	3	1200	13200
259	31.1822	121.522	3	1000	13000
260	31.2267	121.753	0.4	1900	13900
261	31.1763	121.801	1	100	12100
262	31.1754	121.734	2.3	2700	14700
263	31.1976	121.65	1	1300	13300
264	31.1177	121.659	0.8	1300	13300
265	31.2522	121.576	3	900	12900
266	31.2383	121.658	2.3	2700	14700
267	31.1014	121.659	2	2900	14900
268	31.1135	121.634	4	1500	13500
269	31.0837	121.524	1	1400	13400
270	31.2053	121.628	0.7	1000	13000
271	31.1175	121.577	1	1400	13400
272	31.2294	121.631	4	2400	14400
273	31.1757	121.608	2	800	12800
274	31.153	121.732	1.8	2000	14000
275	31.1184	121.759	2	200	12200
276	31.1737	121.747	1	200	12200
277	31.1404	121.683	1	1300	13300
278	31.1699	121.621	0.8	1300	13300
279	31.2173	121.507	3	900	12900
280	31.0731	121.72	2	1100	13100
281	31.1896	121.555	0.6	300	12300
282	31.1465	121.701	3	1200	13200
283	31.2546	121.507	3	1000	13000
284	31.1146	121.55	0.4	1900	13900
285	31.2546	121.505	1	100	12100
286	31.1434	121.559	2.3	2700	14700
287	31.1049	121.484	1	1300	13300
288	31.1908	121.795	0.8	1300	13300
289	31.1782	121.688	3	900	12900
290	31.1262	121.597	0.8	1300	13300

## Sheet: 候选起降场地理信息
候选起降场编号	经度	纬度
1	31.1181	121.678
2	31.1871	121.613
3	31.1691	121.721
4	31.2344	121.707
5	31.1157	121.657
6	31.0875	121.495
7	31.1477	121.565
8	31.0693	121.652
9	31.2423	121.651
10	31.2059	121.783
11	31.2171	121.55
12	31.1694	121.675
13	31.0893	121.581
14	31.1525	121.745
15	31.1124	121.776
16	31.0929	121.739
17	31.2504	121.698
